# Supplementary material for: Projected changes of Active layer thickness over permafrost under 1.5~5.0 °C climate warming on the Qinghai-Tibet Plateau
Source: Copernicus journal article supplement (doi:10.5194/egusphere-2024-1169), 2024-05-13
Supplement: Supplementary file 1 [file egusphere-2024-1169-supplement.pdf]

Supplement of

## Projected changes of Active layer thickness over permafrost under 1.5~5.0°C climate warming on the Qinghai-Tibet Plateau

Table S1. Information of CMIP6 models used in this study

|    | Model name           | Institution, Country                                                                                                                                        | Resolution<br>(Lon×Lat) | Soil<br>layers | Soil<br>depth<br>(m) |
|----|----------------------|-------------------------------------------------------------------------------------------------------------------------------------------------------------|-------------------------|----------------|----------------------|
| 1  | ACCESS-<br>CM2       | Commonwealth Scientific and Industrial Research<br>Organisation (CSIRO), Australia                                                                          | 1.8 ×1.2 °              | 6              | 2.872                |
| 2  | ACCESS-<br>ESM1-5    | Commonwealth Scientific and Industrial Research<br>Organisation (CSIRO), Australia                                                                          | 1.8 ×1.2 °              | 6              | 2.872                |
| 3  | BCC-<br>CSM2-MR      | Beijing Climate Center (BCC), China                                                                                                                         | 1.12 ×1.12 °            | 10             | 2.865                |
| 4  | CanESM5              | Canadian Centre for Climate Modelling and<br>Analysis (CCCma), Canada                                                                                       | ~2.8 ×2.8 °             | 4              | 4.1                  |
| 5  | CanESM5-1            | Canadian Centre for Climate Modelling and<br>Analysis (CCCma), Canada                                                                                       | ~2.8 ×2.8 °             | 4              | 4.1                  |
| 6  | CESM2                | National Center for Atmospheric Research<br>(NCAR), USA                                                                                                     | 1.12 ×0.94 °            | 25             | 41.998               |
| 7  | CESM2-<br>WACCM      | National Center for Atmospheric Research<br>(NCAR), USA                                                                                                     | 0.94 ×1.25 °            | 25             | 41.998               |
| 8  | CMCC-<br>CM2-SR5     | Fondazione Centro Euro-Mediterraneo sui<br>Cambiamenti Climatici (CMCC), Italy                                                                              | 1.0 ×1.0 °              | 15             | 35.178               |
| 9  | CMCC-<br>ESM2        | Fondazione Centro Euro-Mediterraneo sui<br>Cambiamenti Climatici (CMCC), Italy                                                                              | 1.25 ×0.94 °            | 15             | 35.178               |
| 10 | CNRM-<br>CM6-1       | Centre National de Recherches Meteorologiques-<br>Centre Europeen de Recherche et de Formation<br>Avancee en Calcul Scientifique (CNRM-<br>CERFACS), France | 1.4 ×1.4 °              | 14             | 10                   |
| 11 | CNRM-<br>ESM2-1      | Centre National de Recherches Meteorologiques-<br>Centre Europeen de Recherche et de Formation<br>Avancee en Calcul Scientifique (CNRM-<br>CERFACS), France | 1.4 ×1.4 °              | 14             | 10                   |
| 12 | EC-Earth3            | EC-EARTH/ EC-Earth-Consortium                                                                                                                               | 0.7 ×0.7 °              | 4              | 1.945                |
| 13 | EC-Earth3-<br>Veg    | EC-EARTH/ EC-Earth-Consortium                                                                                                                               | 0.7 ×0.7 °              | 4              | 1.945                |
| 14 | EC-Earth3-<br>Veg-LR | EC-EARTH/ EC-Earth-Consortium                                                                                                                               | 1.125 ×1.12 °           | 4              | 1.945                |
| 15 | FGOALS-<br>f3-L      | Chinese Academy of Sciences, China                                                                                                                          | 1.25 ×0.94 °            | 15             | 35.178               |

|    |               |                                                                                                       |                 |    |        |
|----|---------------|-------------------------------------------------------------------------------------------------------|-----------------|----|--------|
| 16 | FGOALS-g3     | Chinese Academy of Sciences, China                                                                    | 2.0 °×2.25 °    | 15 | 35.178 |
| 17 | GFDL-ESM4     | National Oceanic and Atmospheric Administration-Geophysical Fluid Dynamics Laboratory (NOAA-GFDL),USA | 1.25 °×1.0 °    | 20 | 8.75   |
| 18 | GISS-E2-1-G   | Goddard Institute for Space Studies, USA                                                              | 2.5 °×2.0 °     | 6  | 2.735  |
| 19 | GISS-E2-1-H   | Goddard Institute for Space Studies, USA                                                              | 2.5 °×2.0 °     | 6  | 2.735  |
| 20 | IPSL-CM6A-LR  | Institut Pierre Simon Laplace, France                                                                 | 2.5 °×1.27 °    | 18 | 65.562 |
| 21 | MIROC6        | Japan Agency for Marine-Earth Science and Technology, Japan                                           | 1.4 °×1.4 °     | 6  | 9      |
| 22 | MIROC-ES2L    | Japan Agency for Marine-Earth Science and Technology, Japan                                           | 2.81 °×2.79 °   | 6  | 9      |
| 23 | MPI-ESM1-2-HR | Deutsches Klimarechenzentrum, Germany                                                                 | 0.9 °×0.9 °     | 5  | 6.98   |
| 24 | MPI-ESM1-2-LR | Max Planck Institute for Meteorology, Germany                                                         | 1.9 °×1.9 °     | 5  | 6.98   |
| 25 | MRI-ESM2-0    | Meteorological Research Institute (MRI), Japan                                                        | 1.125 °×1.125 ° | 14 | 8.5    |
| 26 | NorESM2-LM    | NorESM Climate modeling Consortium consisting of CICERO (NCC), Norway                                 | 1.9 °×2.5 °     | 25 | 41.998 |
| 27 | NorESM2-MM    | NorESM Climate modeling Consortium consisting of CICERO (NCC), Norway                                 | 0.9 °×1.3 °     | 25 | 41.998 |
| 28 | TaiESM1       | Research Center for Environmental Changes-Academia Sinica (RCEC-AS), Taiwan China                     | 1.3 °×0.9 °     | 15 | 35.178 |
| 29 | UKESM1-0-LL   | Met Office Hadley Centre (MOHC), UK                                                                   | 1.875 °×1.25 °  | 4  | 2      |

Table S2. Periods for 1.5, 2.0, 2.5, 3.0, 3.5, 4.0, 4.5 and 5.0 °C global warming levels in different CMIP6 models

| No. | Model Name     | SSPs     | 1.5 °C    | 2.0 °C    | 2.5 °C    | 3.0 °C    | 3.5 °C    | 4.0 °C    | 4.5 °C    | 5.0 °C    |
|-----|----------------|----------|-----------|-----------|-----------|-----------|-----------|-----------|-----------|-----------|
| 1   | ACCES S-CM2    | SSP1-2.6 | 2018-2037 | 2033-2052 | 2076-2095 | —         | —         | —         | —         | —         |
|     |                | SSP2-4.5 | 2019-2038 | 2031-2050 | 2044-2063 | 2062-2081 | —         | —         | —         | —         |
|     |                | SSP3-7.0 | 2018-2037 | 2030-2049 | 2043-2062 | 2053-2072 | 2063-2082 | 2073-2092 | 2081-2100 | —         |
|     |                | SSP5-8.5 | 2016-2035 | 2029-2048 | 2039-2058 | 2046-2065 | 2054-2073 | 2062-2081 | 2069-2088 | 2076-2095 |
| 2   | ACCES S-ESM1-5 | SSP1-2.6 | 2021-2040 | 2064-2083 | —         | —         | —         | —         | —         | —         |
|     |                | SSP2-4.5 | 2020-2039 | 2036-2055 | 2057-2076 | —         | —         | —         | —         | —         |
|     |                | SSP3-7.0 | 2024-2043 | 2039-2058 | 2049-2068 | 2060-2079 | 2071-2090 | —         | —         | —         |
|     |                | SSP5-8.5 | 2018-2037 | 2030-2049 | 2041-2060 | 2051-2070 | 2061-2080 | 2069-2088 | 2079-2098 | —         |

|    |                         |          |           |           |           |           |           |           |           |           |
|----|-------------------------|----------|-----------|-----------|-----------|-----------|-----------|-----------|-----------|-----------|
| 3  | BCC-                    | SSP1-2.6 | 2032-2051 | —         | —         | —         | —         | —         | —         | —         |
|    | CSM2-                   | SSP2-4.5 | 2026-2045 | 2048-2067 | —         | —         | —         | —         | —         | —         |
|    | MR                      | SSP3-7.0 | 2023-2042 | 2037-2056 | 2051-2070 | 2065-2084 | 2078-2097 | —         | —         | —         |
|    |                         | SSP5-8.5 | 2021-2040 | 2034-2053 | 2045-2064 | 2056-2075 | 2068-2087 | —         | —         | —         |
| 4  | CanES<br>M5             | SSP1-2.6 | —         | 2017-2036 | 2031-2050 | —         | —         | —         | —         | —         |
|    |                         | SSP2-4.5 | —         | 2015-2034 | 2027-2046 | 2040-2059 | 2055-2074 | 2074-2093 | —         | —         |
|    |                         | SSP3-7.0 | —         | —         | 2024-2043 | 2034-2053 | 2042-2061 | 2050-2069 | 2059-2078 | 2067-2086 |
|    |                         | SSP5-8.5 | —         | —         | 2023-2042 | 2031-2050 | 2039-2058 | 2045-2064 | 2052-2071 | 2058-2077 |
| 5  | CanES<br>M5-1           | SSP1-2.6 | —         | —         | 2028-2047 | —         | —         | —         | —         | —         |
|    |                         | SSP2-4.5 | —         | —         | 2025-2044 | 2038-2057 | 2052-2071 | 2071-2090 | —         | —         |
|    |                         | SSP3-7.0 | —         | —         | 2023-2042 | 2032-2051 | 2041-2060 | 2049-2068 | 2057-2076 | 2065-2084 |
|    |                         | SSP5-8.5 | —         | —         | 2022-2041 | 2030-2049 | 2037-2056 | 2044-2063 | 2051-2070 | 2057-2076 |
| 6  | CESM2                   | SSP1-2.6 | 2016-2035 | 2032-2051 | —         | —         | —         | —         | —         | —         |
|    |                         | SSP2-4.5 | 2017-2036 | 2032-2051 | 2049-2068 | 2072-2091 | —         | —         | —         | —         |
|    |                         | SSP3-7.0 | 2016-2035 | 2032-2051 | 2046-2065 | 2057-2076 | 2067-2086 | 2075-2094 | —         | —         |
|    |                         | SSP5-8.5 | 2015-2034 | 2026-2045 | 2035-2054 | 2044-2063 | 2052-2071 | 2060-2079 | 2067-2086 | 2074-2093 |
| 7  | CESM2<br>-<br>WACC<br>M | SSP1-2.6 | —         | 2029-2048 | —         | —         | —         | —         | —         | —         |
|    |                         | SSP2-4.5 | 2015-2034 | 2030-2049 | 2044-2063 | 2066-2085 | —         | —         | —         | —         |
|    |                         | SSP3-7.0 | 2019-2038 | 2032-2051 | 2044-2063 | 2054-2073 | 2065-2084 | 2076-2095 | —         | —         |
|    |                         | SSP5-8.5 | —         | 2024-2043 | 2035-2054 | 2044-2063 | 2052-2071 | 2059-2078 | 2066-2085 | 2072-2091 |
| 8  | CMCC-<br>CM2-<br>SR5    | SSP1-2.6 | —         | 2029-2048 | 2046-2065 | —         | —         | —         | —         | —         |
|    |                         | SSP2-4.5 | 2016-2035 | 2029-2048 | 2042-2061 | 2057-2076 | 2075-2094 | —         | —         | —         |
|    |                         | SSP3-7.0 | 2016-2035 | 2030-2049 | 2041-2060 | 2054-2073 | 2066-2085 | 2078-2097 | —         | —         |
|    |                         | SSP5-8.5 | —         | 2024-2043 | 2034-2053 | 2043-2062 | 2052-2071 | 2060-2079 | 2069-2088 | 2076-2095 |
| 9  | CMCC-<br>ESM2           | SSP1-2.6 | 2022-2041 | 2033-2052 | 2049-2068 | —         | —         | —         | —         | —         |
|    |                         | SSP2-4.5 | 2021-2040 | 2031-2050 | 2042-2061 | 2056-2075 | 2076-2095 | —         | —         | —         |
|    |                         | SSP3-7.0 | 2022-2041 | 2032-2051 | 2042-2061 | 2054-2073 | 2067-2086 | 2078-2097 | —         | —         |
|    |                         | SSP5-8.5 | 2020-2039 | 2030-2049 | 2038-2057 | 2046-2065 | 2053-2072 | 2061-2080 | 2069-2088 | 2078-2097 |
| 10 | CNRM-<br>CM6-1          | SSP1-2.6 | 2018-2037 | 2050-2069 | —         | —         | —         | —         | —         | —         |
|    |                         | SSP2-4.5 | 2021-2040 | 2039-2058 | 2056-2075 | 2075-2094 | —         | —         | —         | —         |
|    |                         | SSP3-7.0 | 2023-2042 | 2036-2055 | 2047-2066 | 2057-2076 | 2066-2085 | 2074-2093 | —         | —         |
|    |                         | SSP5-8.5 | 2019-2038 | 2031-2050 | 2041-2060 | 2049-2068 | 2056-2075 | 2063-2082 | 2069-2088 | 2075-2094 |
| 11 | CNRM-<br>ESM2-<br>1     | SSP1-2.6 | 2038-2057 | —         | —         | —         | —         | —         | —         | —         |
|    |                         | SSP2-4.5 | 2028-2047 | 2046-2065 | 2063-2082 | 2079-2098 | —         | —         | —         | —         |
|    |                         | SSP3-7.0 | 2027-2046 | 2043-2062 | 2054-2073 | 2063-2082 | 2072-2091 | 2080-2099 | —         | —         |
|    |                         | SSP5-8.5 | 2023-2042 | 2036-2055 | 2047-2066 | 2055-2074 | 2063-2082 | 2070-2089 | 2076-2095 | 2081-2100 |
| 12 | EC-<br>Earth3           | SSP1-2.6 | —         | 2034-2053 | —         | —         | —         | —         | —         | —         |
|    |                         | SSP2-4.5 | —         | 2035-2054 | 2049-2068 | 2076-2095 | —         | —         | —         | —         |
|    |                         | SSP3-7.0 | —         | 2029-2048 | 2042-2061 | 2054-2073 | 2064-2083 | 2075-2094 | —         | —         |
|    |                         | SSP5-8.5 | 2015-2034 | 2026-2045 | 2037-2056 | 2048-2067 | 2057-2076 | 2064-2083 | 2071-2090 | 2078-2097 |
| 13 | EC-                     | SSP1-2.6 | —         | 2020-2039 | 2074-2093 | —         | —         | —         | —         | —         |

|    |                      |          |           |           |           |           |           |           |           |           |
|----|----------------------|----------|-----------|-----------|-----------|-----------|-----------|-----------|-----------|-----------|
|    | Earth3-Veg           | SSP2-4.5 | —         | 2024-2043 | 2040-2059 | 2058-2077 | 2078-2097 | —         | —         | —         |
|    |                      | SSP3-7.0 | —         | 2023-2042 | 2036-2055 | 2048-2067 | 2058-2077 | 2067-2086 | 2076-2095 | —         |
|    |                      | SSP5-8.5 | —         | 2018-2037 | 2031-2050 | 2041-2060 | 2050-2069 | 2058-2077 | 2066-2085 | 2073-2092 |
| 14 | EC-                  | SSP1-2.6 | 2021-2040 | —         | —         | —         | —         | —         | —         | —         |
|    | Earth3-Veg-LR        | SSP2-4.5 | 2017-2036 | 2040-2059 | 2059-2078 | 2081-2100 | —         | —         | —         | —         |
|    |                      | SSP3-7.0 | 2019-2038 | 2036-2055 | 2047-2066 | 2057-2076 | 2068-2087 | 2078-2097 | —         | —         |
|    |                      | SSP5-8.5 | 2019-2038 | 2032-2051 | 2043-2062 | 2052-2071 | 2060-2079 | 2066-2085 | 2073-2092 | 2079-2098 |
| 15 | FGOA<br>LS-f3-L      | SSP1-2.6 | —         | 2047-2066 | —         | —         | —         | —         | —         | —         |
|    |                      | SSP2-4.5 | —         | 2031-2050 | 2052-2071 | —         | —         | —         | —         | —         |
|    |                      | SSP3-7.0 | —         | 2027-2046 | 2043-2062 | 2055-2074 | 2069-2088 | —         | —         | —         |
|    |                      | SSP5-8.5 | —         | 2027-2046 | 2039-2058 | 2050-2069 | 2059-2078 | 2069-2088 | —         | —         |
| 16 | FGOA<br>LS-g3        | SSP1-2.6 | —         | —         | —         | —         | —         | —         | —         | —         |
|    |                      | SSP2-4.5 | 2022-2041 | 2056-2075 | —         | —         | —         | —         | —         | —         |
|    |                      | SSP3-7.0 | 2018-2037 | 2037-2056 | 2058-2077 | 2075-2094 | —         | —         | —         | —         |
|    |                      | SSP5-8.5 | 2020-2039 | 2038-2057 | 2049-2068 | 2065-2084 | 2078-2097 | —         | —         | —         |
| 17 | GFDL-<br>ESM4        | SSP1-2.6 | —         | —         | —         | —         | —         | —         | —         | —         |
|    |                      | SSP2-4.5 | 2037-2056 | 2064-2083 | —         | —         | —         | —         | —         | —         |
|    |                      | SSP3-7.0 | 2032-2051 | 2048-2067 | 2060-2079 | 2074-2093 | —         | —         | —         | —         |
|    |                      | SSP5-8.5 | 2030-2049 | 2043-2062 | 2055-2074 | 2066-2085 | 2077-2096 | —         | —         | —         |
| 18 | GISS-<br>E2-1-G      | SSP1-2.6 | 2022-2041 | —         | —         | —         | —         | —         | —         | —         |
|    |                      | SSP2-4.5 | 2023-2042 | 2045-2064 | 2075-2094 | —         | —         | —         | —         | —         |
|    |                      | SSP3-7.0 | 2024-2043 | 2039-2058 | 2054-2073 | 2071-2090 | —         | —         | —         | —         |
|    |                      | SSP5-8.5 | 2021-2040 | 2034-2053 | 2045-2064 | 2056-2075 | 2069-2088 | 2081-2100 | —         | —         |
| 19 | GISS-<br>E2-1-H      | SSP1-2.6 | 2016-2035 | 2034-2053 | —         | —         | —         | —         | —         | —         |
|    |                      | SSP2-4.5 | 2018-2037 | 2032-2051 | 2055-2074 | 2073-2092 | —         | —         | —         | —         |
|    |                      | SSP3-7.0 | 2018-2037 | 2031-2050 | 2044-2063 | 2060-2079 | 2072-2091 | —         | —         | —         |
|    |                      | SSP5-8.5 | 2015-2034 | 2025-2044 | 2038-2057 | 2050-2069 | 2059-2078 | 2068-2087 | 2078-2097 | —         |
| 20 | IPSL-<br>CM6A-<br>LR | SSP1-2.6 | —         | 2029-2048 | —         | —         | —         | —         | —         | —         |
|    |                      | SSP2-4.5 | —         | 2024-2043 | 2039-2058 | 2056-2075 | 2075-2094 | —         | —         | —         |
|    |                      | SSP3-7.0 | —         | 2025-2044 | 2035-2054 | 2046-2065 | 2058-2077 | 2067-2086 | 2076-2095 | —         |
|    |                      | SSP5-8.5 | —         | 2025-2044 | 2034-2053 | 2041-2060 | 2049-2068 | 2057-2076 | 2063-2082 | 2069-2088 |
| 21 | MIROC<br>6           | SSP1-2.6 | 2054-2073 | —         | —         | —         | —         | —         | —         | —         |
|    |                      | SSP2-4.5 | 2037-2056 | 2064-2083 | —         | —         | —         | —         | —         | —         |
|    |                      | SSP3-7.0 | 2034-2053 | 2050-2069 | 2067-2086 | —         | —         | —         | —         | —         |
|    |                      | SSP5-8.5 | 2031-2050 | 2044-2063 | 2056-2075 | 2067-2086 | 2077-2096 | —         | —         | —         |
| 22 | MIROC<br>-ES2L       | SSP1-2.6 | 2032-2051 | —         | —         | —         | —         | —         | —         | —         |
|    |                      | SSP2-4.5 | 2032-2051 | 2054-2073 | —         | —         | —         | —         | —         | —         |
|    |                      | SSP3-7.0 | 2030-2049 | 2046-2065 | 2062-2081 | 2075-2094 | —         | —         | —         | —         |
|    |                      | SSP5-8.5 | 2025-2044 | 2038-2057 | 2049-2068 | 2061-2080 | 2072-2091 | —         | —         | —         |
| 23 | MPI-<br>ESM1-        | SSP1-2.6 | 2037-2056 | —         | —         | —         | —         | —         | —         | —         |
|    |                      | SSP2-4.5 | 2033-2042 | 2059-2078 | —         | —         | —         | —         | —         | —         |

|    |              |          |           |           |           |           |           |           |           |           |
|----|--------------|----------|-----------|-----------|-----------|-----------|-----------|-----------|-----------|-----------|
|    | 2-HR         | SSP3-7.0 | 2030-2049 | 2046-2065 | 2061-2080 | 2077-2096 | —         | —         | —         | —         |
|    |              | SSP5-8.5 | 2029-2048 | 2045-2064 | 2057-2076 | 2069-2088 | 2079-2098 | —         | —         | —         |
| 24 | MPI-ESM1-    | SSP1-2.6 | 2053-2072 | —         | —         | —         | —         | —         | —         | —         |
|    |              | SSP2-4.5 | 2047-2066 | 2068-2087 | —         | —         | —         | —         | —         | —         |
|    | 2-LR         | SSP3-7.0 | 2046-2065 | 2063-2082 | 2077-2096 | —         | —         | —         | —         | —         |
|    |              | SSP5-8.5 | 2045-2064 | 2059-2078 | 2072-2091 | —         | —         | —         | —         | —         |
| 25 | MRI-ESM2-    | SSP1-2.6 | 2020-2039 | —         | —         | —         | —         | —         | —         | —         |
|    |              | SSP2-4.5 | 2021-2040 | 2040-2059 | 2065-2084 | —         | —         | —         | —         | —         |
|    | 0            | SSP3-7.0 | 2022-2041 | 2036-2055 | 2050-2069 | 2064-2083 | 2078-2097 | —         | —         | —         |
|    |              | SSP5-8.5 | 2017-2036 | 2029-2048 | 2042-2061 | 2055-2074 | 2064-2083 | 2074-2093 | —         | —         |
| 26 | NorES M2-LM  | SSP1-2.6 | —         | —         | —         | —         | —         | —         | —         | —         |
|    |              | SSP2-4.5 | 2046-2065 | 2076-2095 | —         | —         | —         | —         | —         | —         |
|    |              | SSP3-7.0 | 2042-2061 | 2060-2079 | 2072-2091 | —         | —         | —         | —         | —         |
|    |              | SSP5-8.5 | 2033-2052 | 2047-2066 | 2058-2077 | 2068-2087 | 2077-2096 | —         | —         | —         |
| 27 | NorES M2-MM  | SSP1-2.6 | —         | —         | —         | —         | —         | —         | —         | —         |
|    |              | SSP2-4.5 | 2037-2056 | 2069-2088 | —         | —         | —         | —         | —         | —         |
|    |              | SSP3-7.0 | 2037-2056 | 2053-2072 | 2069-2088 | 2081-2100 | —         | —         | —         | —         |
|    |              | SSP5-8.5 | 2030-2049 | 2045-2064 | 2057-2076 | 2067-2086 | 2076-2095 | —         | —         | —         |
| 28 | TaiES M1     | SSP1-2.6 | 2018-2037 | 2031-2050 | 2057-2076 | —         | —         | —         | —         | —         |
|    |              | SSP2-4.5 | 2022-2041 | 2034-2053 | 2046-2065 | 2059-2078 | 2075-2094 | —         | —         | —         |
|    |              | SSP3-7.0 | 2024-2043 | 2034-2053 | 2043-2062 | 2052-2071 | 2062-2081 | 2072-2091 | —         | —         |
|    |              | SSP5-8.5 | 2019-2038 | 2027-2046 | 2035-2054 | 2043-2062 | 2051-2070 | 2058-2077 | 2066-2085 | 2073-2092 |
| 29 | UKES M1-0-LL | SSP1-2.6 | —         | 2027-2046 | 2051-2070 | —         | —         | —         | —         | —         |
|    |              | SSP2-4.5 | —         | 2025-2044 | 2037-2056 | 2050-2069 | 2065-2084 | 2081-2100 | —         | —         |
|    |              | SSP3-7.0 | —         | 2022-2041 | 2031-2050 | 2041-2060 | 2051-2070 | 2060-2079 | 2068-2087 | 2075-2094 |
|    |              | SSP5-8.5 | —         | 2022-2041 | 2030-2049 | 2037-2056 | 2044-2063 | 2051-2070 | 2057-2076 | 2063-2082 |

Note: "-" means that there no exist a time meeting the global warming requirements in 2015-2100 under different SSPs; "--" means that there is no sufficiently long time series to reach target warming (the time of about 10 years before and after to form a 20-year temperature rise period), although there is a time to meet the warming requirements.
